# Supplementary material
Source: publisher figshare collection journal article supplement (https://geolsoc.figshare.com/ndownloader/files/31096368)
Supplement: Supplementary file 1 [file 31096368]

## Sheet: Sheet1
							Isotope ratios						Apparent ages (Ma)
Analysis	U	206Pb	U/Th	206Pb*	±	207Pb*	±	206Pb*	±	error	206Pb*	±	207Pb*	±	206Pb*	±	Best age	±
	(ppm)	204Pb		207Pb*	(%)	235U*	(%)	238U	(%)	corr.	238U*	(Ma)	235U	(Ma)	207Pb*	(Ma)	(Ma)	(Ma)
CQT-1 (Lab code 352-27)
35227-1	25.214	1548	1.27974	17.7864	13.0782	0.699037	13.5727	0.0901752	3.63001	0.26745	556.573	19.3561	538.215	56.7603	461.154	291.04	556.573	19.3561
35227-2	125.604	5193	1.35297	15.8992	3.60933	0.803992	4.26382	0.0927097	2.27	0.532386	571.543	12.4155	599.078	19.2974	704.707	76.8243	571.543	12.4155
35227-3	105.558	11964	2.2704	11.9792	1.21608	2.43341	3.7336	0.211417	3.53	0.945469	1236.36	39.7141	1252.53	26.875	1280.41	23.7003	1280.41	23.7003
35227-4	56.8335	5676	1.21925	8.38959	2.70111	4.35758	10.426	0.265146	10.07	0.965857	1516.11	136.068	1704.33	86.3112	1944.19	48.306	1944.19	48.306
35227-5	66.4562	5508	0.29011	12.7189	3.26372	2.1098	4.06901	0.194622	2.43	0.597198	1146.36	25.5205	1152.01	28.0374	1162.64	64.707	1162.64	64.707
35227-6	287.312	8796	3.81576	12.3766	3.00799	2.06408	3.36125	0.185279	1.50001	0.446264	1095.75	15.1153	1136.97	22.9949	1216.52	59.1711	1216.52	59.1711
35227-7	358.194	18309	1.18503	12.768	2.20137	2.00595	3.27146	0.185755	2.42	0.739732	1098.34	24.4389	1117.52	22.1706	1155	43.6867	1155	43.6867
35227-8	366.564	1620	1.64132	19.5778	4.40866	0.123819	5.25508	0.0175812	2.86	0.544235	112.351	3.1854	118.528	5.87901	244.345	101.601	112.351	3.1854
35227-9	133.524	2892	2.33248	6.49442	8.96648	7.65418	9.06763	0.360527	1.35058	0.148945	1984.67	23.0712	2191.24	81.6075	2390.57	152.952	2390.57	152.952
35227-10	201.756	5370	1.13953	16.182	2.24341	0.870257	2.60803	0.102136	1.33	0.509965	626.915	7.94537	635.707	12.3228	667.07	48.0386	626.915	7.94537
35227-11	77.6366	14991	1.57138	8.69231	3.11344	5.20014	5.15612	0.32783	4.11	0.797111	1827.86	65.4156	1852.64	43.9377	1880.56	56.1078	1880.56	56.1078
35227-12	434.68	9306	1.86505	19.5124	3.78214	0.3022	3.8205	0.0427664	0.54	0.141343	269.958	1.42767	268.117	9.00281	252.05	87.0315	269.958	1.42767
35227-13	308.435	10038	2.49986	17.945	3.51114	0.511187	3.66478	0.0665307	1.05	0.286511	415.22	4.22237	419.247	12.5881	441.44	78.1263	415.22	4.22237
35227-14	284.007	11934	1.9138	16.0062	2.15783	0.885869	3.49553	0.102839	2.75	0.786719	631.025	16.5309	644.148	16.674	690.409	46.0282	631.025	16.5309
35227-15	299.439	14829	2.13716	13.3943	2.07081	1.68565	2.61692	0.163751	1.6	0.611407	977.591	14.5132	1003.12	16.6792	1059.31	41.6827	1059.31	41.6827
35227-16	101.497	15912	1.40689	9.03012	1.49064	4.68581	2.22363	0.306886	1.65	0.742031	1725.36	24.9772	1764.71	18.6094	1811.59	27.0836	1811.59	27.0836
35227-17	98.9782	864	1.38466	18.8283	8.87319	0.147243	9.58699	0.0201069	3.63	0.378638	128.331	4.61236	139.475	12.4944	333.548	201.505	128.331	4.61236
35227-18	154.24	20646	1.2797	9.1031	1.88042	4.77146	3.48992	0.315021	2.94	0.842425	1765.37	45.4025	1779.89	29.3043	1796.95	34.2257	1796.95	34.2257
35227-19	781.548	8139	0.874947	19.8586	2.44914	0.185112	7.43496	0.0266613	7.02	0.944187	169.619	11.752	172.45	11.7924	211.436	56.765	169.619	11.752
35227-20	115.414	19092	2.34027	8.95017	1.83161	4.49018	6.57046	0.29147	6.31	0.960359	1648.87	91.8093	1729.16	54.6162	1827.72	33.2114	1827.72	33.2114
35227-21	280.63	34611	1.53957	11.0185	1.97045	2.97385	2.78632	0.237652	1.97	0.707027	1374.48	24.3854	1400.96	21.1754	1441.47	37.5541	1441.47	37.5541
35227-22	210.593	9816	2.66707	17.2097	3.17467	0.655862	3.92027	0.0818625	2.3	0.586694	507.23	11.2191	512.08	15.7677	533.769	69.5222	507.23	11.2191
35227-23	186.019	4263	3.46201	17.2179	2.78543	0.669958	3.05716	0.0836616	1.26	0.412148	517.942	6.27078	520.687	12.4541	532.729	61.008	517.942	6.27078
35227-24	161.78	5853	4.83963	16.4653	3.82921	0.708216	3.89267	0.0845732	0.700008	0.179827	523.362	3.5188	543.686	16.3884	629.803	82.5219	523.362	3.5188
35227-25	159.014	23223	1.75196	9.18919	1.71047	4.69445	1.83339	0.312867	0.660001	0.359989	1754.8	10.1392	1766.25	15.348	1779.8	31.2004	1779.8	31.2004
35227-26	261.152	11979	2.4322	15.3108	1.75659	1.13875	2.36263	0.126452	1.58	0.668746	767.591	11.4337	771.916	12.7737	784.427	36.9012	767.591	11.4337
35227-27	373.174	7395	0.428076	18.1728	1.17748	0.446369	3.5132	0.0588321	3.31	0.942162	368.519	11.8559	374.733	11.0094	413.311	26.3213	368.519	11.8559
35227-28	318.058	56943	2.38778	4.11361	3.81001	19.5575	5.04045	0.583491	3.3	0.654703	2962.98	78.3921	3069.73	48.7277	3140.35	60.5552	3140.35	60.5552
35227-29	353.783	17352	3.97948	16.1312	1.97006	0.875657	2.89405	0.102447	2.12	0.732538	628.735	12.6998	638.634	13.7196	673.796	42.1383	628.735	12.6998
35227-30	184.127	19413	3.07449	11.761	3.15009	2.44138	5.73299	0.208247	4.79	0.835515	1219.47	53.2214	1254.88	41.3193	1316.13	61.0952	1316.13	61.0952
35227-31	518.082	49404	2.12565	9.08617	2.38023	4.80788	2.7121	0.316835	1.3	0.479333	1774.25	20.1635	1786.28	22.8005	1800.34	43.3088	1800.34	43.3088
35227-32	73.6041	2943	1.72339	15.9072	3.06777	0.904602	3.42368	0.104364	1.52	0.443968	639.933	9.2598	654.184	16.5126	703.631	65.3037	639.933	9.2598
35227-33	51.6073	4113	0.596209	13.6833	3.15685	1.70511	3.88827	0.169217	2.27	0.583808	1007.8	21.1785	1010.45	24.8909	1016.2	63.9681	1016.2	63.9681
35227-34	314.55	28578	1.43741	10.6135	3.78051	3.09173	5.88493	0.237991	4.51	0.766364	1376.25	55.8919	1430.64	45.1806	1512.5	71.3841	1512.5	71.3841
35227-35	314.826	11460	1.20888	13.1568	3.21192	1.50319	5.09883	0.143438	3.96	0.776649	864.071	32.0234	931.68	31.0997	1095.21	64.316	1095.21	64.316
35227-36	288.928	17769	2.86307	12.6956	1.85663	1.89352	6.29024	0.17435	6.01	0.955448	1036.04	57.5214	1078.82	41.8202	1166.28	36.7844	1166.28	36.7844
35227-37	449.311	5250	3.32221	16.0503	1.85019	0.643639	3.28136	0.0749247	2.71	0.825878	465.758	12.1769	504.556	13.048	684.54	39.5023	465.758	12.1769
35227-38	203.212	11880	3.45027	13.9507	1.65196	1.4836	1.92077	0.150111	0.980001	0.510212	901.587	8.24553	923.704	11.6509	976.874	33.6699	901.587	8.24553
35227-39	54.7081	7380	2.78094	12.1764	2.57842	2.41924	3.37004	0.213648	2.17	0.64391	1248.22	24.6256	1248.33	24.2157	1248.5	50.4845	1248.5	50.4845
35227-40	66.3543	8388	0.889762	9.14929	3.18219	4.45025	4.81983	0.295305	3.62	0.751064	1667.98	53.2029	1721.75	39.981	1787.73	57.9965	1787.73	57.9965
35227-41	116.651	5169	2.49289	17.1509	2.89322	0.671494	3.70852	0.0835273	2.32	0.625586	517.142	11.5291	521.62	15.1286	541.254	63.2767	517.142	11.5291
35227-42	248.428	7293	1.8786	16.3715	2.59855	0.793687	2.89229	0.0942405	1.27	0.439098	580.567	7.05094	593.261	12.9957	642.09	55.8751	580.567	7.05094
35227-43	468.687	1707	1.20735	18.0832	10.4934	0.0928368	10.6823	0.0121757	2	0.187225	78.0156	1.55091	90.1426	9.21453	424.352	234.691	78.0156	1.55091
35227-44	82.5134	1368	0.533871	15.5318	11.2913	0.732539	11.3659	0.0825183	1.30004	0.114381	511.137	6.38837	558.042	48.8332	754.256	239.036	511.137	6.38837
35227-45	769.072	51399	2.38066	10.122	2.12013	3.18782	2.6804	0.234024	1.64	0.611848	1355.55	20.0493	1454.21	20.7203	1601.47	39.5572	1601.47	39.5572
35227-46	365.807	58740	12.3401	17.3202	2.19406	0.718735	2.25031	0.0902859	0.5	0.222192	557.228	2.66912	549.92	9.55531	519.744	48.1577	557.228	2.66912
35227-47	149.261	4803	4.42929	17.141	2.55493	0.703196	2.83126	0.08742	1.22	0.430903	540.26	6.32254	540.698	11.8698	542.523	55.8629	540.26	6.32254
35227-48	287.822	8649	7.64201	16.1994	2.59281	0.852158	2.66132	0.10012	0.600002	0.225452	615.109	3.52006	625.833	12.4334	664.768	55.5425	615.109	3.52006
35227-49	150.615	4185	0.743696	15.1001	12.7219	0.866498	12.9176	0.0948957	2.24001	0.173408	584.426	12.5153	633.664	60.9638	813.465	266.992	584.426	12.5153
35227-50	459.225	31641	7.48408	12.423	2.30036	2.11595	3.60833	0.190647	2.78	0.770439	1124.88	28.6955	1154.02	24.885	1209.15	45.2936	1209.15	45.2936
35227-51	115.152	5580	3.47598	16.0693	2.28595	0.917735	2.47168	0.106958	0.940003	0.38031	655.057	5.85504	661.161	12.0108	682.019	48.8294	655.057	5.85504
35227-52	116.156	12189	0.876575	9.24188	3.32038	4.26311	3.3873	0.28575	0.670001	0.197798	1620.25	9.59894	1686.27	27.8661	1769.37	60.6542	1769.37	60.6542
35227-53	177.75	5601	1.42163	16.0746	2.92457	0.857402	3.24239	0.0999594	1.4	0.43178	614.171	8.2015	628.703	15.1987	681.313	62.4824	614.171	8.2015
35227-54	444.987	29928	4.32582	8.31114	2.61002	5.00505	3.30652	0.301695	2.03	0.613938	1699.71	30.3303	1820.18	27.99	1960.96	46.584	1960.96	46.584
35227-55	43.4695	6795	1.26514	8.05886	2.89197	6.04551	3.0143	0.35335	0.850007	0.281992	1950.58	14.3066	1982.42	26.2684	2015.79	51.2908	2015.79	51.2908
35227-56	454.828	16041	2.12006	17.8541	1.06648	0.559509	2.17013	0.072451	1.89	0.870914	450.905	8.2309	451.207	7.90577	452.722	23.6769	450.905	8.2309
35227-57	456.138	14262	9.64268	13.481	2.31108	1.61804	3.0174	0.158201	1.94	0.642938	946.773	17.0823	977.231	18.9376	1046.31	46.6119	1046.31	46.6119
35227-58	170.69	3612	1.12337	16.2436	6.18777	0.62345	6.25726	0.0734485	0.930009	0.148629	456.898	4.10211	492.007	24.404	658.93	132.777	456.898	4.10211
35227-59	114.963	6597	1.50519	14.2266	3.42594	1.07557	7.97353	0.110979	7.2	0.902988	678.429	46.3652	741.47	41.9787	936.842	70.2723	678.429	46.3652
35227-60	318.8	30399	0.614978	7.00849	1.45051	7.439	2.40632	0.378127	1.92	0.797898	2067.53	33.9603	2165.67	21.5413	2260.02	25.0313	2260.02	25.0313
35227-61	640.847	40122	2.84003	11.1464	3.63021	2.79527	5.24809	0.225972	3.79	0.722167	1313.36	45.0338	1354.27	39.2671	1419.46	69.4101	1419.46	69.4101
35227-62	323.459	6297	1.10685	18.2964	3.41545	0.385967	4.54591	0.0512169	3	0.659934	321.988	9.42239	331.419	12.855	398.143	76.5715	321.988	9.42239
35227-63	165.478	5796	2.13138	17.3046	2.44958	0.663504	4.03789	0.0832728	3.21	0.79497	515.628	15.907	516.755	16.3547	521.719	53.7486	515.628	15.907
35227-64	387.426	24207	1.89809	12.6406	2.94102	2.05197	3.73358	0.188121	2.3	0.616031	1111.19	23.476	1132.95	25.494	1174.88	58.2015	1174.88	58.2015
35227-65	152.318	1947	3.3675	19.0888	6.826	0.297283	8.45544	0.0411574	4.99	0.590153	260.003	12.716	264.276	19.6769	302.307	155.771	260.003	12.716
35227-66	323.823	9909	4.22482	15.4158	2.56474	1.03199	3.09927	0.115382	1.74	0.561422	703.929	11.6033	719.921	15.9838	770.06	54.0053	703.929	11.6033
35227-68	293.383	10842	2.26694	16.9565	2.93672	0.742598	3.18778	0.0913247	1.24	0.388986	563.367	6.6892	563.921	13.7944	566.134	63.9585	563.367	6.6892
35227-69	158.039	5532	2.40931	16.8698	3.25639	0.732213	3.99831	0.0895872	2.32	0.580246	553.095	12.2968	557.851	17.1626	577.284	70.791	553.095	12.2968
35227-70	266.436	9795	1.8935	16.1883	3.02178	0.80045	3.31784	0.0939796	1.37	0.41292	579.03	7.58688	597.082	14.9785	666.242	64.7208	579.03	7.58688
35227-71	495.43	47247	1.48114	9.7705	1.7102	3.99119	2.63911	0.282825	2.01	0.761621	1605.57	28.5672	1632.4	21.4314	1667.13	31.6375	1667.13	31.6375
35227-72	54.1112	2904	2.2577	16.5082	8.2689	0.928286	8.47993	0.111143	1.88002	0.221703	679.381	12.1225	666.732	41.4738	624.189	178.584	679.381	12.1225
35227-73	276.277	25791	7.22601	10.0142	1.57173	3.55977	2.66324	0.258545	2.15	0.807288	1482.39	28.4726	1540.61	21.1145	1621.43	29.2491	1621.43	29.2491
35227-74	460.025	34065	24.1587	12.9275	1.25233	1.8765	1.89334	0.175939	1.42	0.749997	1044.75	13.6957	1072.83	12.542	1130.32	24.9407	1130.32	24.9407
35227-75	479.504	13971	24.9456	16.6378	2.93497	0.689124	3.06694	0.0831559	0.89	0.290192	514.932	4.40464	532.274	12.7056	607.299	63.4794	514.932	4.40464
CQT-2 (Lab code 352-28)
35228-1	226.504	28656	1.78597	13.6305	0.671699	1.74439	1.41904	0.172446	1.25	0.880876	1025.58	11.8519	1025.09	9.15872	1024.03	13.5913	1024.03	13.5913
35228-2	225.546	50140	1.11923	8.70097	1.53025	5.393	1.83351	0.340328	1.01	0.550857	1888.25	16.5321	1883.74	15.7063	1878.77	27.5741	1878.77	27.5741
35228-3	141.421	9024	1.30123	16.9198	1.81242	0.710167	2.75886	0.0871472	2.08	0.753936	538.643	10.7485	544.845	11.6332	570.852	39.4356	538.643	10.7485
35228-4	1126.93	3608	1.90203	14.3821	8.94295	0.511157	9.72072	0.0533182	3.81	0.391946	334.861	12.4325	419.227	33.3987	914.514	184.37	334.861	12.4325
35228-5	375.429	5640	0.715192	17.593	8.64914	0.333407	9.22213	0.0425414	3.2	0.346992	268.567	8.41758	292.163	23.418	485.346	191.262	268.567	8.41758
35228-6	328.299	12004	3.96565	17.4555	1.60306	0.613651	1.72609	0.0776877	0.64	0.370779	482.306	2.97411	485.86	6.66519	502.636	35.2859	482.306	2.97411
35228-7	157.639	8592	2.19263	15.5064	3.15372	1.03229	3.43844	0.116094	1.37	0.398437	708.044	9.18648	720.071	17.7358	757.703	66.5465	708.044	9.18648
35228-8	291.375	10476	1.43118	17.3562	2.67414	0.629461	3.02777	0.0792361	1.42	0.468992	491.562	6.72068	495.76	11.8768	515.177	58.7434	491.562	6.72068
35228-9	277.386	24960	1.31929	13.1862	1.51111	1.92689	1.6782	0.184278	0.73	0.43499	1090.3	7.32254	1090.46	11.2187	1090.75	30.2727	1090.75	30.2727
35228-10	355.722	5084	2.2873	15.9527	1.62518	0.6634	1.82943	0.0767555	0.840001	0.45916	476.727	3.86002	516.691	7.40852	697.546	34.6246	476.727	3.86002
35228-11	257.306	1608	1.59145	14.2045	11.0991	0.244716	11.1726	0.0252108	1.28	0.114566	160.504	2.02909	222.275	22.3073	940.032	228.154	160.504	2.02909
35228-12	148.461	8856	2.21969	16.5461	2.73049	0.844844	3.81896	0.101384	2.67	0.699143	622.515	15.8439	621.815	17.7597	619.25	58.9371	622.515	15.8439
35228-13	406.13	42320	1.87664	13.4895	1.38029	1.78453	1.66997	0.174589	0.94	0.562885	1037.35	9.00694	1039.83	10.8674	1045.04	27.8415	1045.04	27.8415
35228-14	199.474	21424	1.30614	12.8977	1.15118	2.01467	1.25507	0.188459	0.5	0.398383	1113.02	5.11117	1120.47	8.51674	1134.92	22.9101	1134.92	22.9101
35228-15	90.4079	15136	2.42255	10.6096	1.57068	3.47928	2.40405	0.267724	1.82	0.757057	1529.24	24.7773	1522.53	18.9629	1513.2	29.6453	1513.2	29.6453
35228-16	128.189	33956	1.48275	5.36793	1.32011	11.1958	3.05044	0.435873	2.75	0.901509	2332.14	53.8152	2539.57	28.4414	2709.69	21.7759	2709.69	21.7759
35228-17	317.971	23752	1.34091	12.1689	1.58017	2.39011	1.70113	0.210945	0.63	0.370342	1233.85	7.07464	1239.64	12.1785	1249.71	30.9325	1249.71	30.9325
35228-18	216.025	14848	2.75773	15.5913	5.34136	0.786223	6.12618	0.0889052	3	0.489701	549.059	15.7898	589.027	27.3864	746.175	112.966	549.059	15.7898
35228-19	323.579	10232	4.18913	19.3635	3.88682	0.335292	4.437	0.0470874	2.14	0.482308	296.615	6.20375	293.598	11.3132	269.643	89.1591	296.615	6.20375
35228-20	1346.64	15644	3.01512	13.1464	2.45237	1.55857	3.10841	0.148604	1.91	0.614461	893.135	15.9299	953.901	19.2287	1096.81	49.0902	1096.81	49.0902
35228-21	1118.04	10412	1.43264	20.9826	3.36747	0.0886117	3.52737	0.0134849	1.05	0.297672	86.3485	0.900614	86.2093	2.91542	82.3342	79.94	86.3485	0.900614
35228-22	580.279	17592	1.05993	18.8131	1.02348	0.385566	1.76666	0.0526089	1.44	0.815096	330.519	4.63952	331.125	4.99182	335.368	23.1957	330.519	4.63952
35228-23	240.2	60336	72.0979	8.14281	1.13009	6.1339	2.04968	0.362251	1.71	0.834275	1992.83	29.3136	1995.08	17.8966	1997.4	20.0811	1997.4	20.0811
35228-24	386.453	12272	3.787	17.0401	1.76393	0.68447	2.82764	0.0845911	2.21	0.781571	523.468	11.1114	529.473	11.6671	555.418	38.4819	523.468	11.1114
35228-26	77.9622	10844	1.14786	12.1188	1.34547	2.40522	1.80953	0.211404	1.21	0.668683	1236.29	13.6122	1244.16	12.9786	1257.79	26.3047	1257.79	26.3047
35228-27	266.433	10948	1.27843	17.546	1.60597	0.60042	1.69116	0.0764069	0.53	0.313394	474.64	2.42522	477.5	6.44231	491.239	35.4206	474.64	2.42522
35228-28	113.504	2184	1.48724	18.8403	11.1764	0.184429	11.2036	0.0252009	0.78	0.0696207	160.442	1.236	171.865	17.7154	332.102	254.134	160.442	1.236
35228-29	444.365	50304	1.35915	12.7088	1.81011	2.04205	3.35096	0.188222	2.82	0.841551	1111.73	28.7967	1129.64	22.844	1164.21	35.8734	1164.21	35.8734
35228-30	323.77	18760	1.56639	9.1496	1.31167	4.81936	1.40374	0.319808	0.500003	0.356193	1788.79	7.81034	1788.28	11.8046	1787.67	23.9013	1787.67	23.9013
35228-31	291.304	51200	2.52243	9.05203	1.57006	4.85019	2.40364	0.318422	1.82	0.757185	1782.02	28.3362	1793.65	20.237	1807.18	28.5423	1807.18	28.5423
35228-34	160.11	11672	4.45053	15.9255	0.913796	0.982307	1.25484	0.113459	0.860001	0.685347	692.805	5.64913	694.787	6.31394	701.187	19.4546	692.805	5.64913
35228-35	526.25	9120	9.55132	11.5222	2.09624	2.28494	3.11195	0.190945	2.3	0.739087	1126.49	23.772	1207.64	21.9825	1355.79	40.4234	1355.79	40.4234
35228-36	501.863	50676	1.59045	13.4822	1.81012	1.81235	2.74981	0.177216	2.07	0.75278	1051.75	20.088	1049.93	17.9949	1046.12	36.508	1046.12	36.508
35228-38	109.994	10308	1.49046	11.5293	1.2212	2.61314	1.95761	0.218507	1.53	0.781567	1273.98	17.6867	1304.34	14.3768	1354.6	23.5533	1354.6	23.5533
35228-39	260.654	5512	5.43505	15.7307	4.14377	0.709711	4.4565	0.0809709	1.64	0.368002	501.915	7.91913	544.575	18.7859	727.332	87.8826	501.915	7.91913
35228-40	425.625	8200	3.32302	18.8986	5.72727	0.316176	6.79148	0.0433368	3.65	0.537438	273.483	9.77336	278.957	16.5672	325.093	130.128	273.483	9.77336
35228-41	311.012	15816	1.74834	11.2029	1.1721	2.78245	2.48393	0.226078	2.19	0.881667	1313.91	26.0318	1350.84	18.5555	1409.78	22.4322	1409.78	22.4322
35228-42	355.732	13928	5.9626	17.162	2.0691	0.627172	2.19744	0.0780644	0.74	0.336755	484.559	3.45429	494.333	8.60025	539.842	45.259	484.559	3.45429
35228-43	223.68	9724	0.481386	17.8378	2.24008	0.551992	3.85715	0.0714124	3.14	0.814073	444.659	13.4917	446.301	13.9305	454.753	49.7205	444.659	13.4917
35228-44	407.612	18040	0.952467	17.4025	2.20639	0.580291	2.6457	0.0732414	1.46	0.551838	455.654	6.42289	464.649	9.86492	509.326	48.5148	455.654	6.42289
35228-45	157.074	19596	1.84921	13.3492	1.59142	1.80269	3.02283	0.174533	2.57	0.850197	1037.04	24.6187	1046.43	19.7444	1066.09	31.9998	1066.09	31.9998
35228-46	221.532	7236	1.24377	17	2.54023	0.639131	3.3215	0.0788019	2.14	0.644286	488.967	10.0769	501.768	13.1512	560.556	55.3737	488.967	10.0769
35228-47	36.9236	2588	1.14089	16.9225	10.0497	0.756808	10.3657	0.0928856	2.54	0.245039	572.58	13.9164	572.167	45.371	570.504	219.165	572.58	13.9164
35228-48	105.728	7828	1.13408	13.4938	1.92837	1.68173	2.8881	0.164585	2.15	0.744435	982.209	19.5875	1001.64	18.3921	1044.39	38.9037	1044.39	38.9037
35228-49	341.37	10076	2.11176	16.7428	3.14012	0.661934	3.46294	0.0803787	1.46	0.421607	498.383	7.00223	515.796	14.0057	593.689	68.0725	498.383	7.00223
35228-50	411.949	15304	1.66791	17.7582	1.60148	0.584794	1.97746	0.0753184	1.16	0.586611	468.118	5.2377	467.538	7.40927	464.668	35.4837	468.118	5.2377
35228-51	222.076	44136	2.39357	5.21938	1.21011	13.0679	3.83588	0.494678	3.64	0.948935	2590.88	77.6633	2684.57	36.1955	2755.88	19.8804	2755.88	19.8804
35228-52	235.571	10252	1.4475	17.4838	1.68578	0.611832	1.75837	0.0775829	0.5	0.284354	481.679	2.32062	484.715	6.77734	499.075	37.1299	481.679	2.32062
35228-53	442.236	5104	0.838036	14.8774	4.20749	0.791545	4.25894	0.0854087	0.660001	0.154968	528.326	3.34789	592.048	19.1087	844.452	87.573	528.326	3.34789
35228-54	444.385	3524	2.74902	12.3909	15.1121	0.941532	15.2019	0.0846126	1.65002	0.10854	523.596	8.29789	673.684	74.9906	1214.25	298.971	523.596	8.29789
35228-55	344.648	23208	5.01237	13.7131	2.57015	1.35465	5.64859	0.134729	5.03	0.890488	814.788	38.5	869.567	33.0084	1011.8	52.1089	814.788	38.5
35228-56	77.4579	14976	1.20396	8.87146	1.58148	5.06403	1.81963	0.325829	0.900002	0.494606	1818.13	14.2582	1830.1	15.4306	1843.73	28.6188	1843.73	28.6188
35228-57	287.895	15628	1.35681	17.3558	2.38288	0.588385	4.10289	0.0740635	3.34	0.81406	460.59	14.847	469.836	15.4333	515.237	52.3424	460.59	14.847
35228-58	146.565	27448	0.676896	8.69041	1.34052	5.08618	1.59267	0.320576	0.860001	0.539974	1792.54	13.4581	1833.8	13.5154	1880.96	24.1479	1880.96	24.1479
35228-59	90.4987	18940	2.57981	11.4335	1.45283	2.88428	1.85289	0.239174	1.15	0.620652	1382.4	14.3086	1377.81	13.9712	1370.69	27.9567	1370.69	27.9567
35228-60	240.311	28712	2.01352	8.3377	1.08191	5.16565	2.41581	0.312371	2.16	0.894111	1752.36	33.1428	1846.98	20.5541	1955.26	19.3196	1955.26	19.3196
35228-61	451.929	36452	1.80907	12.8544	1.58026	2.00448	1.87546	0.186876	1.01	0.538536	1104.43	10.2515	1117.03	12.7055	1141.61	31.4211	1141.61	31.4211
35228-62	309.933	10084	0.935001	17.6667	1.57178	0.584789	1.65556	0.0749295	0.52	0.314093	465.786	2.33666	467.534	6.20309	476.104	34.7567	465.786	2.33666
35228-63	345.575	17276	4.56998	12.4045	2.42696	1.96474	2.49073	0.17676	0.560003	0.224835	1049.25	5.42255	1103.51	16.7616	1212.09	47.767	1212.09	47.767
35228-64	130.448	6744	1.34085	17.145	3.3186	0.659437	3.69729	0.0819992	1.63	0.440863	508.045	7.96322	514.27	14.9196	542.01	72.5758	508.045	7.96322
35228-65	318.001	10576	1.08126	16.8621	1.11428	0.688442	1.92523	0.0841932	1.57	0.815485	521.103	7.85938	531.864	7.97083	578.279	24.2134	521.103	7.85938
35228-66	302.116	22560	2.15824	13.8384	1.76239	1.49558	2.42108	0.150105	1.66	0.685644	901.552	13.9664	928.591	14.7336	993.329	35.8291	901.552	13.9664
35228-67	104.367	8308	0.943041	14.7964	2.72833	1.28334	2.78521	0.137719	0.560002	0.201063	831.753	4.36986	838.339	15.8962	855.806	56.6709	831.753	4.36986
35228-68	121.189	15892	1.97479	12.6426	1.67108	2.21133	1.75616	0.202762	0.54	0.307489	1190.14	5.86841	1184.63	12.2796	1174.57	33.0672	1174.57	33.0672
35228-70	85.0827	9816	1.02256	7.89219	0.891748	6.0588	1.18474	0.346803	0.780002	0.658372	1919.32	12.9477	1984.34	10.3258	2052.77	15.7443	2052.77	15.7443
35228-71	176.499	7864	1.05371	15.397	4.52098	0.914672	4.80584	0.102141	1.63	0.339171	626.943	9.73798	659.538	23.3156	772.628	95.1884	626.943	9.73798
35228-72	348.803	10620	0.848634	12.9128	1.75683	1.72345	2.39653	0.161406	1.63	0.680151	964.583	14.603	1017.31	15.4001	1132.59	34.9791	1132.59	34.9791
35228-73	241.078	15364	1.26354	17.1658	1.63086	0.686401	2.52678	0.0854558	1.93	0.763819	528.606	9.79502	530.636	10.4431	539.352	35.6754	528.606	9.79502
35228-75	354.219	11940	1.78603	16.446	1.08325	0.770114	1.59447	0.0918576	1.17	0.733787	566.514	6.34532	579.829	7.0438	632.32	23.3285	566.514	6.34532
CQT-5 (Lab code 352-29)
35229-1	563.507	10476	2.01822	15.2452	3.07504	0.904389	4.11867	0.0999969	2.74	0.665263	614.391	16.057	654.07	19.8629	793.442	64.5133	614.391	16.057
35229-2	999.964	9416	1.7259	21.0539	4.14414	0.0941384	4.17663	0.0143746	0.52	0.124502	92.0052	0.475029	91.3511	3.64882	74.2757	98.5283	92.0052	0.475029
35229-3	91.2451	10732	1.22848	11.4219	1.5635	2.706	1.94089	0.224162	1.15	0.592515	1303.83	13.5751	1330.1	14.3907	1372.64	30.0789	1372.64	30.0789
35229-4	414.803	15928	2.11964	13.0812	1.34118	1.76781	2.66247	0.167719	2.3	0.863859	999.53	21.2957	1033.72	17.2686	1106.74	26.8039	1106.74	26.8039
35229-5	508.146	40276	3.07061	10.5792	2.60041	2.78662	11.2156	0.213812	10.91	0.97275	1249.09	123.902	1351.96	83.9979	1518.61	49.0539	1518.61	49.0539
35229-6	217.891	6856	1.20142	8.85313	2.89103	3.90607	5.53503	0.250804	4.72001	0.852752	1442.62	61.0126	1614.94	44.7752	1847.47	52.306	1847.47	52.306
35229-7	357.043	47372	1.25031	13.6024	1.70029	1.66574	2.31428	0.164331	1.57	0.678397	980.802	14.2844	995.564	14.6847	1028.21	34.3852	1028.21	34.3852
35229-8	100.534	18880	1.3822	10.9847	1.20253	2.95893	1.4016	0.235735	0.720001	0.5137	1364.48	8.85421	1397.14	10.6372	1447.33	22.8996	1447.33	22.8996
35229-9	283.902	13652	4.69908	17.3095	2.41532	0.596044	2.54752	0.0748277	0.81	0.317956	465.176	3.63519	474.72	9.66038	521.09	53.0023	465.176	3.63519
35229-10	181.169	9772	2.53372	11.4806	1.53345	2.36364	1.77301	0.196808	0.890001	0.501971	1158.15	9.43469	1231.68	12.6513	1362.77	29.541	1362.77	29.541
35229-11	278.798	43368	0.997228	5.65184	2.03006	12.0974	2.87797	0.495883	2.04	0.708832	2596.08	43.595	2611.98	26.9976	2624.33	33.7636	2624.33	33.7636
35229-12	231.88	4772	1.2498	15.9869	4.23479	0.604102	4.73134	0.0700445	2.11	0.445963	436.423	8.90375	479.833	18.0941	692.984	90.3204	436.423	8.90375
35229-14	121.734	33112	1.62185	5.32357	1.42006	12.4167	2.94499	0.479411	2.58	0.876065	2524.7	53.8973	2636.44	27.681	2723.36	23.3957	2723.36	23.3957
35229-15	179.323	15060	3.55055	12.2598	1.35168	2.01488	2.14071	0.179157	1.66	0.775444	1062.37	16.2588	1120.54	14.5277	1235.13	26.5121	1235.13	26.5121
35229-16	313.2	18024	1.168	13.1017	3.01164	1.61704	3.43401	0.153655	1.65	0.480487	921.421	14.1669	976.844	21.548	1103.62	60.2279	1103.62	60.2279
35229-17	168.794	1596	1.20654	13.0317	18.0809	0.443871	18.0878	0.0419524	0.500026	0.0276443	264.923	1.29784	372.978	56.5188	1114.32	363.823	264.923	1.29784
35229-18	154.049	18056	0.940424	13.7835	1.73093	1.66311	2.11767	0.166257	1.22	0.576106	991.455	11.2115	994.562	13.429	1001.4	35.1478	1001.4	35.1478
35229-19	160.029	10284	2.17754	16.9927	1.38322	0.701468	1.76108	0.086451	1.09	0.61894	534.513	5.59119	539.667	7.37224	561.483	30.1439	534.513	5.59119
35229-20	208.773	9052	1.54488	17.4736	3.70068	0.589218	3.94267	0.0746721	1.36	0.344944	464.242	6.09172	470.368	14.8438	500.352	81.5129	464.242	6.09172
35229-21	337.255	4376	1.57263	15.4858	4.31083	0.60727	4.39	0.0682046	0.830003	0.189067	425.33	3.41631	481.837	16.8433	760.51	90.9386	425.33	3.41631
35229-22	213.957	2884	1.16962	14.8487	6.90343	0.78482	7.6997	0.0845194	3.41	0.442874	523.042	17.1314	588.229	34.3911	848.475	143.694	523.042	17.1314
35229-23	228.481	2024	1.16321	18.2563	11.1634	0.109282	11.1746	0.0144698	0.5	0.0447443	92.6098	0.459739	105.309	11.1786	403.051	250.685	92.6098	0.459739
35229-24	285.102	26952	1.23751	11.6721	2.07072	2.64217	2.71116	0.22367	1.75	0.64548	1301.24	20.6206	1312.46	19.9729	1330.83	40.0728	1330.83	40.0728
35229-25	86.3636	6952	0.654808	8.48797	3.57407	5.50926	3.92823	0.339153	1.63005	0.414957	1882.59	26.6125	1902.04	33.7714	1923.31	64.0872	1923.31	64.0872
35229-26	395.479	15804	10.3944	16.695	1.99607	0.760198	2.11525	0.0920475	0.7	0.33093	567.635	3.80353	574.124	9.27618	599.876	43.2211	567.635	3.80353
35229-27	176.55	12336	1.03719	16.5427	3.01645	0.871744	3.19397	0.104591	1.05	0.328744	641.259	6.40916	636.514	15.1055	619.682	65.1079	641.259	6.40916
35229-28	181.562	16448	1.49566	12.7177	2.84102	2.01252	3.08018	0.185629	1.19	0.386341	1097.66	12.0106	1119.74	20.8967	1162.84	56.3201	1162.84	56.3201
35229-29	297.537	11168	1.75548	15.8465	2.34319	0.913669	2.76613	0.105008	1.47	0.531429	643.69	9.00518	659.006	13.4106	711.762	49.8091	643.69	9.00518
35229-30	72.4151	3124	0.950598	16.277	4.62427	0.790714	4.65123	0.0933455	0.500008	0.1075	575.293	2.75189	591.577	20.857	654.525	99.2615	575.293	2.75189
35229-31	145.909	35236	1.28971	9.04903	1.46019	4.80041	2.05783	0.31505	1.45	0.704627	1765.51	22.3937	1784.97	17.2942	1807.79	26.5425	1807.79	26.5425
35229-32	35.8243	8692	0.65823	11.5271	3.46354	2.71999	4.49811	0.227397	2.87	0.638046	1320.84	34.2771	1333.93	33.4073	1354.98	66.8147	1354.98	66.8147
35229-33	695.972	2760	2.86232	12.5115	15.6723	0.558156	16.1312	0.0506482	3.82001	0.236809	318.5	11.8711	450.325	58.7387	1195.16	311.041	318.5	11.8711
35229-34	179.283	10976	1.7411	17.009	1.85633	0.671466	1.99471	0.0828326	0.73	0.365969	513.008	3.59982	521.603	8.13663	559.398	40.4693	513.008	3.59982
35229-35	132.717	1368	3.08425	10.3105	13.4653	1.17315	13.5543	0.0877261	1.55004	0.114358	542.075	8.0588	788.116	74.4296	1566.99	253.504	1566.99	253.504
35229-36	92.9798	46612	1.41565	3.42386	1.60001	28.2978	1.8557	0.702695	0.94	0.506548	3430.86	25.008	3429.47	18.2013	3428.64	24.8692	3428.64	24.8692
35229-37	200.513	22124	1.14028	10.5392	1.63078	3.4522	1.93417	0.263878	1.04	0.537697	1509.65	13.9975	1516.37	15.2293	1525.75	30.7287	1525.75	30.7287
35229-38	141.421	7356	1.37378	16.1249	4.32641	0.801322	4.44733	0.0937138	1.03	0.2316	577.464	5.68926	597.574	20.091	674.632	92.5552	577.464	5.68926
35229-39	339.968	4584	1.3818	15.2398	3.50108	0.697716	3.70756	0.077118	1.22	0.329058	478.897	5.63081	537.426	15.4727	794.189	73.4466	478.897	5.63081
35229-40	447.239	96984	2.3105	6.13609	1.13002	9.33774	1.39619	0.415559	0.82	0.587314	2240.28	15.5181	2371.73	12.806	2486.7	19.0509	2486.7	19.0509
35229-41	237.165	27692	3.21977	13.5524	1.82168	1.71022	3.24051	0.1681	2.68	0.827031	1001.63	24.8624	1012.37	20.7659	1035.65	36.7992	1035.65	36.7992
35229-42	394.995	19160	8.22667	13.292	1.02504	1.66691	1.83333	0.160694	1.52	0.829091	960.632	13.5658	996.01	11.6357	1074.73	20.5825	1074.73	20.5825
35229-43	367.966	9428	1.61465	16.4296	3.70356	0.706285	3.79542	0.0841599	0.83	0.218685	520.905	4.15344	542.538	15.9534	634.475	79.75	520.905	4.15344
35229-44	137.73	7056	0.465073	17.6205	2.96297	0.602929	3.48781	0.077052	1.84	0.527552	478.502	8.48562	479.091	13.3217	481.89	65.4639	478.502	8.48562
35229-45	57.5085	9224	1.61361	11.6211	3.59421	2.58126	3.89082	0.217559	1.49	0.382954	1268.96	17.163	1295.34	28.4826	1339.3	69.4867	1339.3	69.4867
35229-46	335.671	11152	3.82326	17.2367	1.56112	0.597373	2.52141	0.0746791	1.98	0.785275	464.285	8.8696	475.565	9.5747	530.332	34.202	464.285	8.8696
35229-47	228.047	6548	1.37803	16.3752	7.69572	0.634871	7.83864	0.0753999	1.49	0.190084	468.607	6.7345	499.125	30.9177	641.607	165.689	468.607	6.7345
35229-48	347.784	20028	2.64701	19.2191	4.07094	0.333681	4.23298	0.0465119	1.16	0.274039	293.071	3.3235	292.372	10.7541	286.773	93.0977	293.071	3.3235
35229-49	114.523	24652	2.19218	7.65694	1.11056	5.933	2.51813	0.329479	2.26	0.897493	1835.86	36.1059	1966.08	21.884	2106.04	19.4906	2106.04	19.4906
35229-50	232.011	15664	4.66618	16.7611	2.10306	0.77549	2.20419	0.0942708	0.66	0.29943	580.746	3.66534	582.908	9.77576	591.318	45.6039	580.746	3.66534
35229-51	227.19	22292	0.830937	10.7749	2.07075	3.07057	3.06523	0.239956	2.26	0.737303	1386.47	28.1939	1425.38	23.4819	1483.96	39.2405	1483.96	39.2405
35229-52	405.999	32352	5.62084	7.89215	1.79074	4.57814	7.91523	0.262049	7.71	0.974072	1500.32	103.209	1745.3	66.0549	2052.78	31.6217	2052.78	31.6217
35229-53	314.35	3640	1.39498	16.8331	3.31871	0.577974	3.94886	0.0705621	2.14001	0.54193	439.542	9.09271	463.158	14.6872	582.01	72.0894	439.542	9.09271
35229-54	276.993	33328	5.1638	11.3511	2.09072	2.71471	2.21781	0.22349	0.74	0.333662	1300.29	8.71382	1332.49	16.4585	1384.6	40.1561	1384.6	40.1561
35229-56	289.388	35852	2.32022	10.6764	1.58028	3.20794	1.94273	0.248398	1.13	0.581657	1430.21	14.4941	1459.08	15.0394	1501.35	29.8763	1501.35	29.8763
35229-57	26.021	2440	2.21823	15.0489	7.34083	1.00245	7.68973	0.109412	2.29001	0.297801	669.334	14.5589	705.052	39.1072	820.561	153.5	669.334	14.5589
35229-58	376.115	5684	1.875	16.7258	2.50869	0.578233	2.7119	0.0701437	1.03	0.379807	437.022	4.35213	463.325	10.089	595.887	54.3613	437.022	4.35213
35229-59	172.293	3844	1.05923	18.542	6.5754	0.32277	6.59439	0.0434059	0.500001	0.0758222	273.91	1.34086	284.031	16.3399	368.17	148.297	273.91	1.34086
35229-60	313.533	2688	1.11134	15.1099	2.51549	1.02024	2.68539	0.111806	0.940006	0.350045	683.225	6.09373	714.036	13.771	812.117	52.6135	683.225	6.09373
35229-61	80.1609	3076	1.80875	14.3753	19.7764	1.01699	19.791	0.10603	0.760005	0.0384016	649.652	4.69675	712.397	101.662	915.492	410.7	649.652	4.69675
35229-62	179.555	9920	1.43126	15.8381	2.28093	0.844768	4.38921	0.0970371	3.75	0.854369	597.022	21.383	621.773	20.4113	712.899	48.476	597.022	21.383
35229-63	362.499	19008	1.30788	12.8182	2.67067	1.88689	2.8088	0.175417	0.87	0.309741	1041.89	8.36986	1076.49	18.643	1147.21	53.065	1147.21	53.065
35229-64	212.868	1284	1.25468	15.6333	5.68059	0.193653	5.90982	0.0219571	1.63	0.275812	140.013	2.25761	179.742	9.73563	740.482	120.261	140.013	2.25761
35229-65	466.805	11332	1.10312	18.0266	3.12119	0.449855	3.39668	0.0588148	1.34	0.394503	368.414	4.79833	377.178	10.7016	431.335	69.5669	368.414	4.79833
35229-66	457.536	4324	1.67359	12.9334	3.88705	1.30877	4.76726	0.122765	2.76	0.578949	746.458	19.4543	849.587	27.4466	1129.42	77.4502	746.458	19.4543
35229-67	98.5269	8672	3.76794	16.0495	2.50775	0.869144	2.62924	0.10117	0.790001	0.300467	621.261	4.67889	635.102	12.4146	684.657	53.5457	621.261	4.67889
35229-68	255.964	12432	1.42989	13.0048	1.49577	1.73563	2.57011	0.163704	2.09	0.813196	977.33	18.9532	1021.84	16.5584	1118.44	29.8446	1118.44	29.8446
35229-69	330.639	6284	0.892668	17.6442	1.9547	0.415222	2.33104	0.0531352	1.27	0.544822	333.741	4.13067	352.629	6.94451	478.915	43.2053	333.741	4.13067
35229-70	142.864	24100	1.20068	8.63373	1.37079	5.3624	1.8961	0.335781	1.31	0.690894	1866.34	21.2282	1878.87	16.228	1892.74	24.6619	1892.74	24.6619
35229-71	206.988	18168	1.13517	10.5198	1.42097	3.27796	2.04452	0.250097	1.47	0.718996	1438.98	18.9584	1475.84	15.9083	1529.23	26.7644	1529.23	26.7644
35229-72	325.505	4476	2.23374	14.9634	5.47866	0.799791	5.58217	0.0867972	1.07001	0.191683	536.568	5.50888	596.711	25.1928	832.452	114.282	536.568	5.50888
35229-73	519.18	19320	4.93204	16.9686	2.14167	0.634049	2.25316	0.0780313	0.7	0.310674	484.361	3.26628	498.615	8.87751	564.576	46.6511	484.361	3.26628
35229-74	164.558	5804	1.15796	15.7747	1.79828	0.829116	2.11327	0.0948581	1.11	0.525251	584.205	6.19952	613.122	9.72687	721.413	38.1627	584.205	6.19952
35229-75	646.643	1968	2.19535	16.0458	6.67433	0.0995162	6.70688	0.0115812	0.66	0.0984064	74.2283	0.487097	96.3297	6.16379	685.143	142.622	74.2283	0.487097
